# Supplementary material
Source: publisher figshare collection journal article supplement (https://tandf.figshare.com/ndownloader/files/14312948)

Appendix C: The average (black line) ± standard deviation (grey dotted line) of the entire transmissibility, phase and coherence responses of 21 participants for 24 anatomical locations. Coherence plot only shows negative standard deviation, as measure above unity are not possible. Excluded measurements include: one participant at T2P1, T3P1, and H1 and two participants at M4.


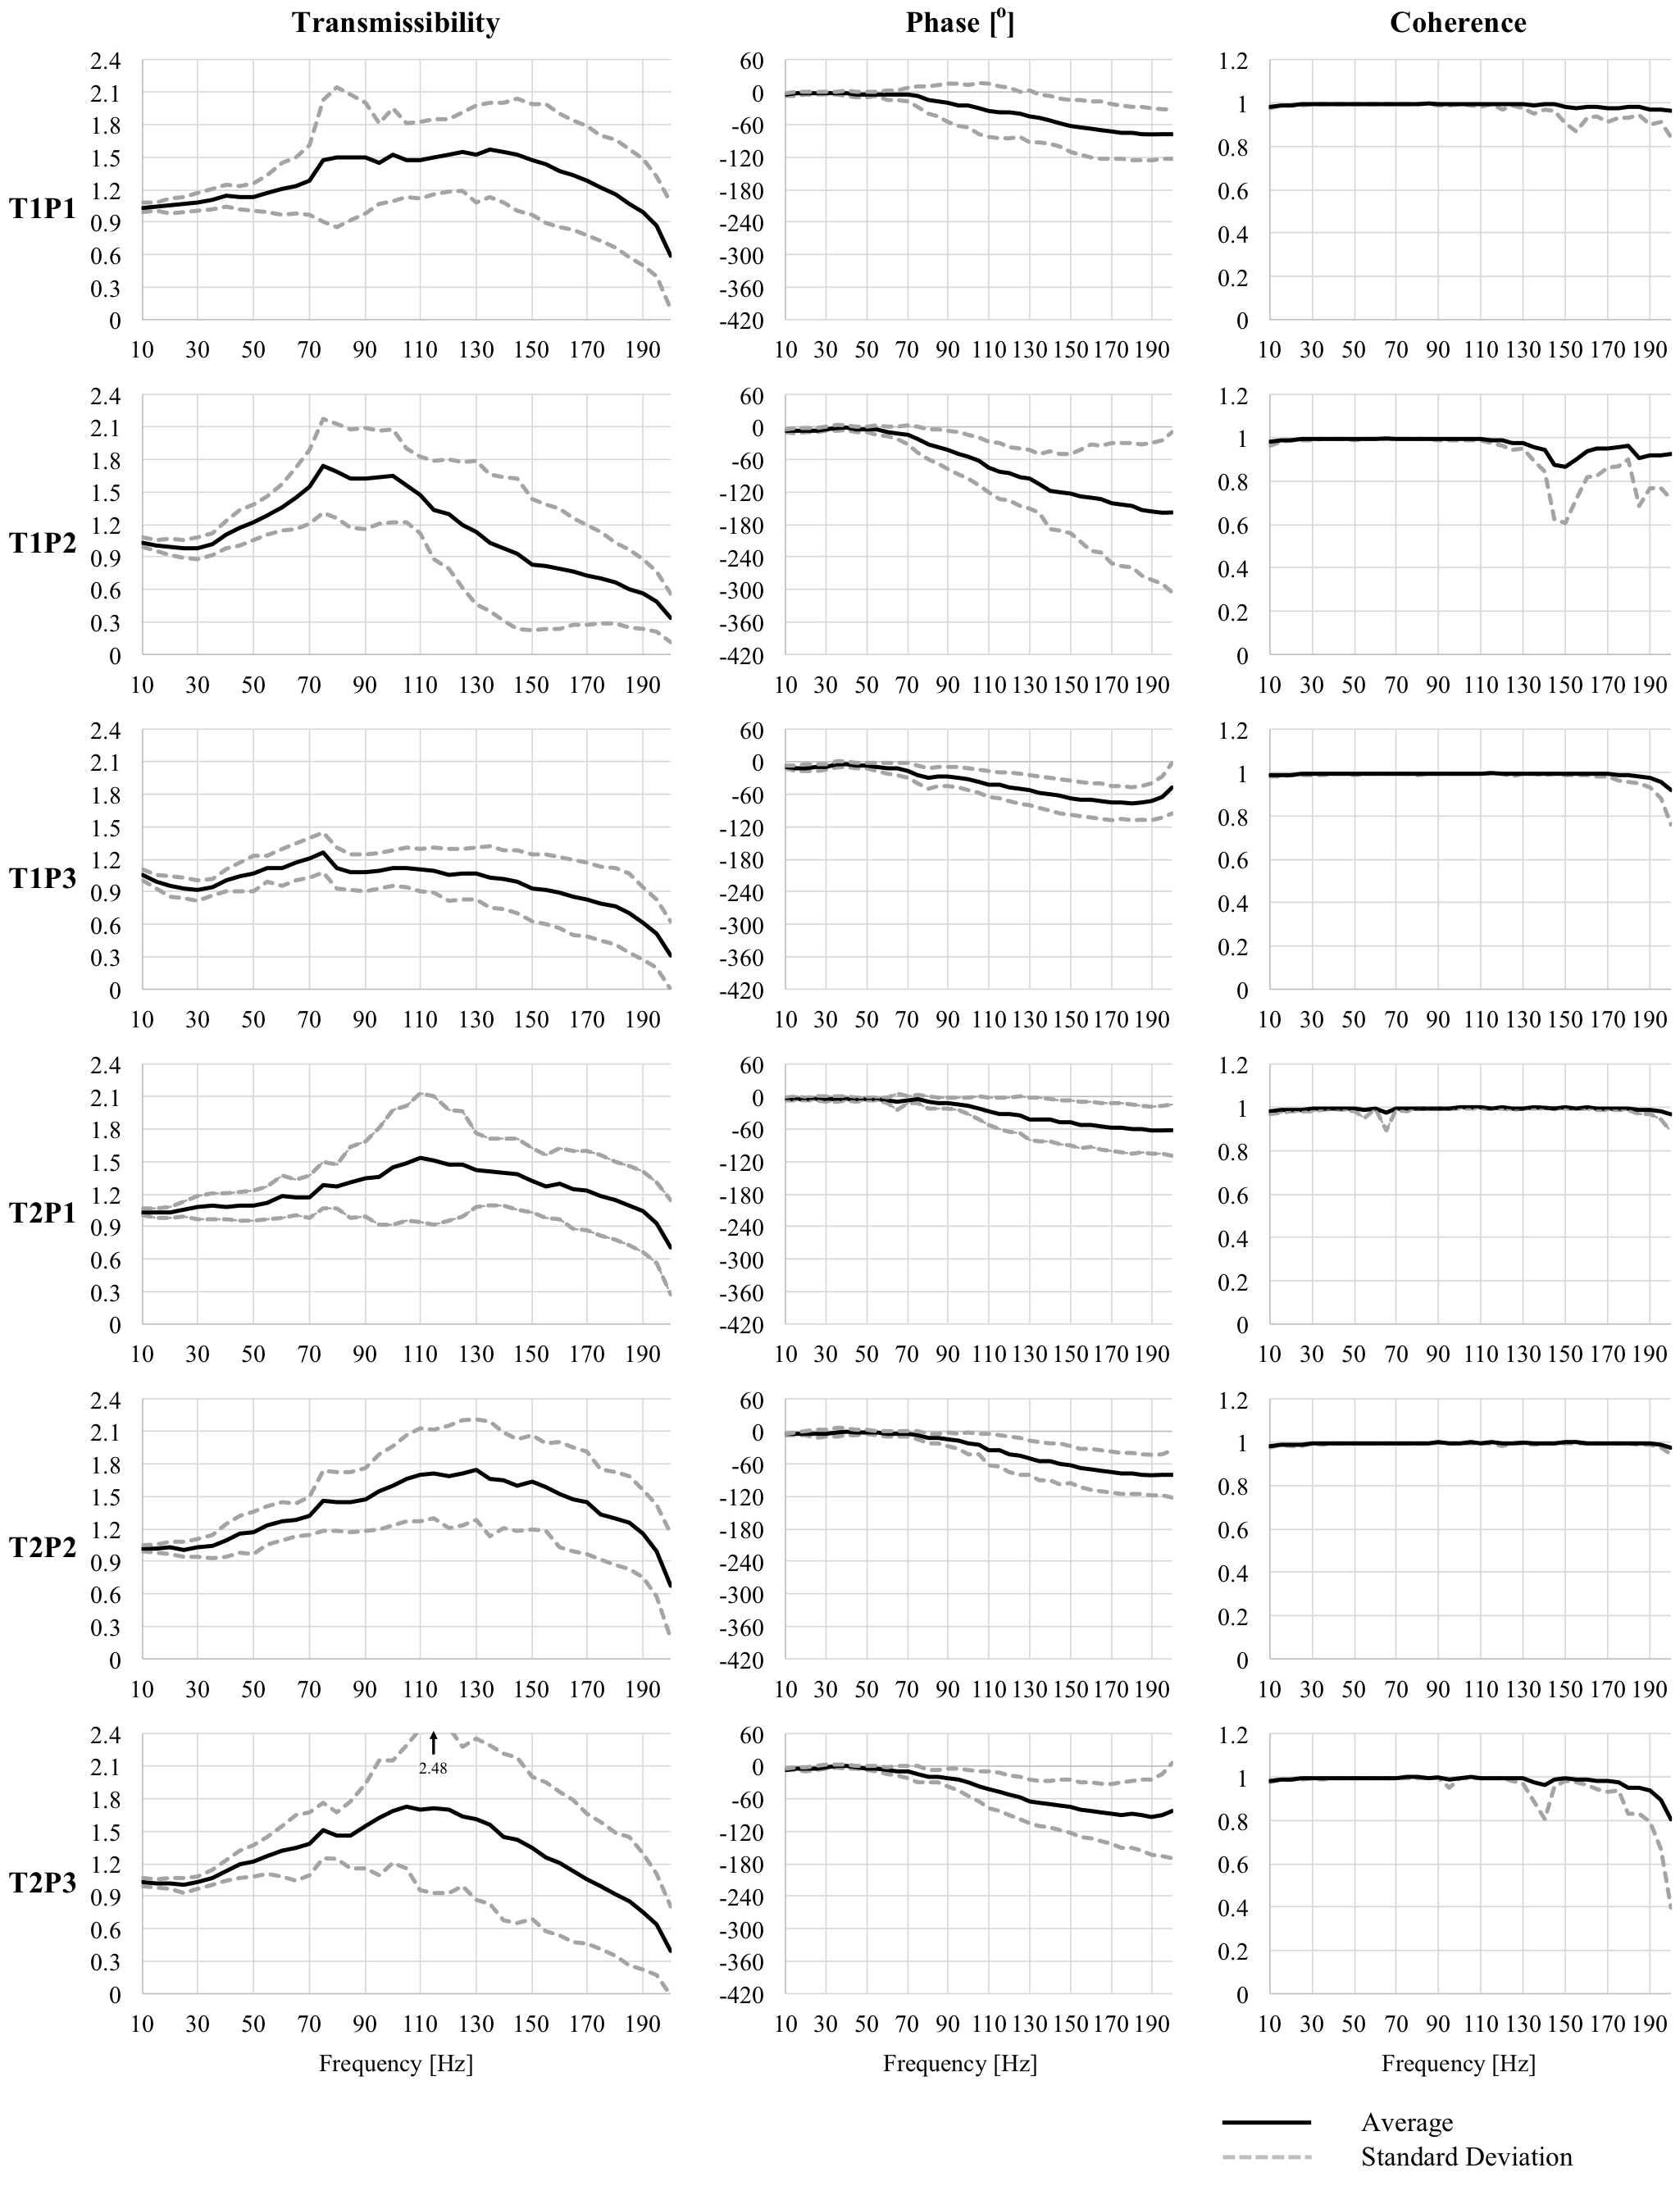


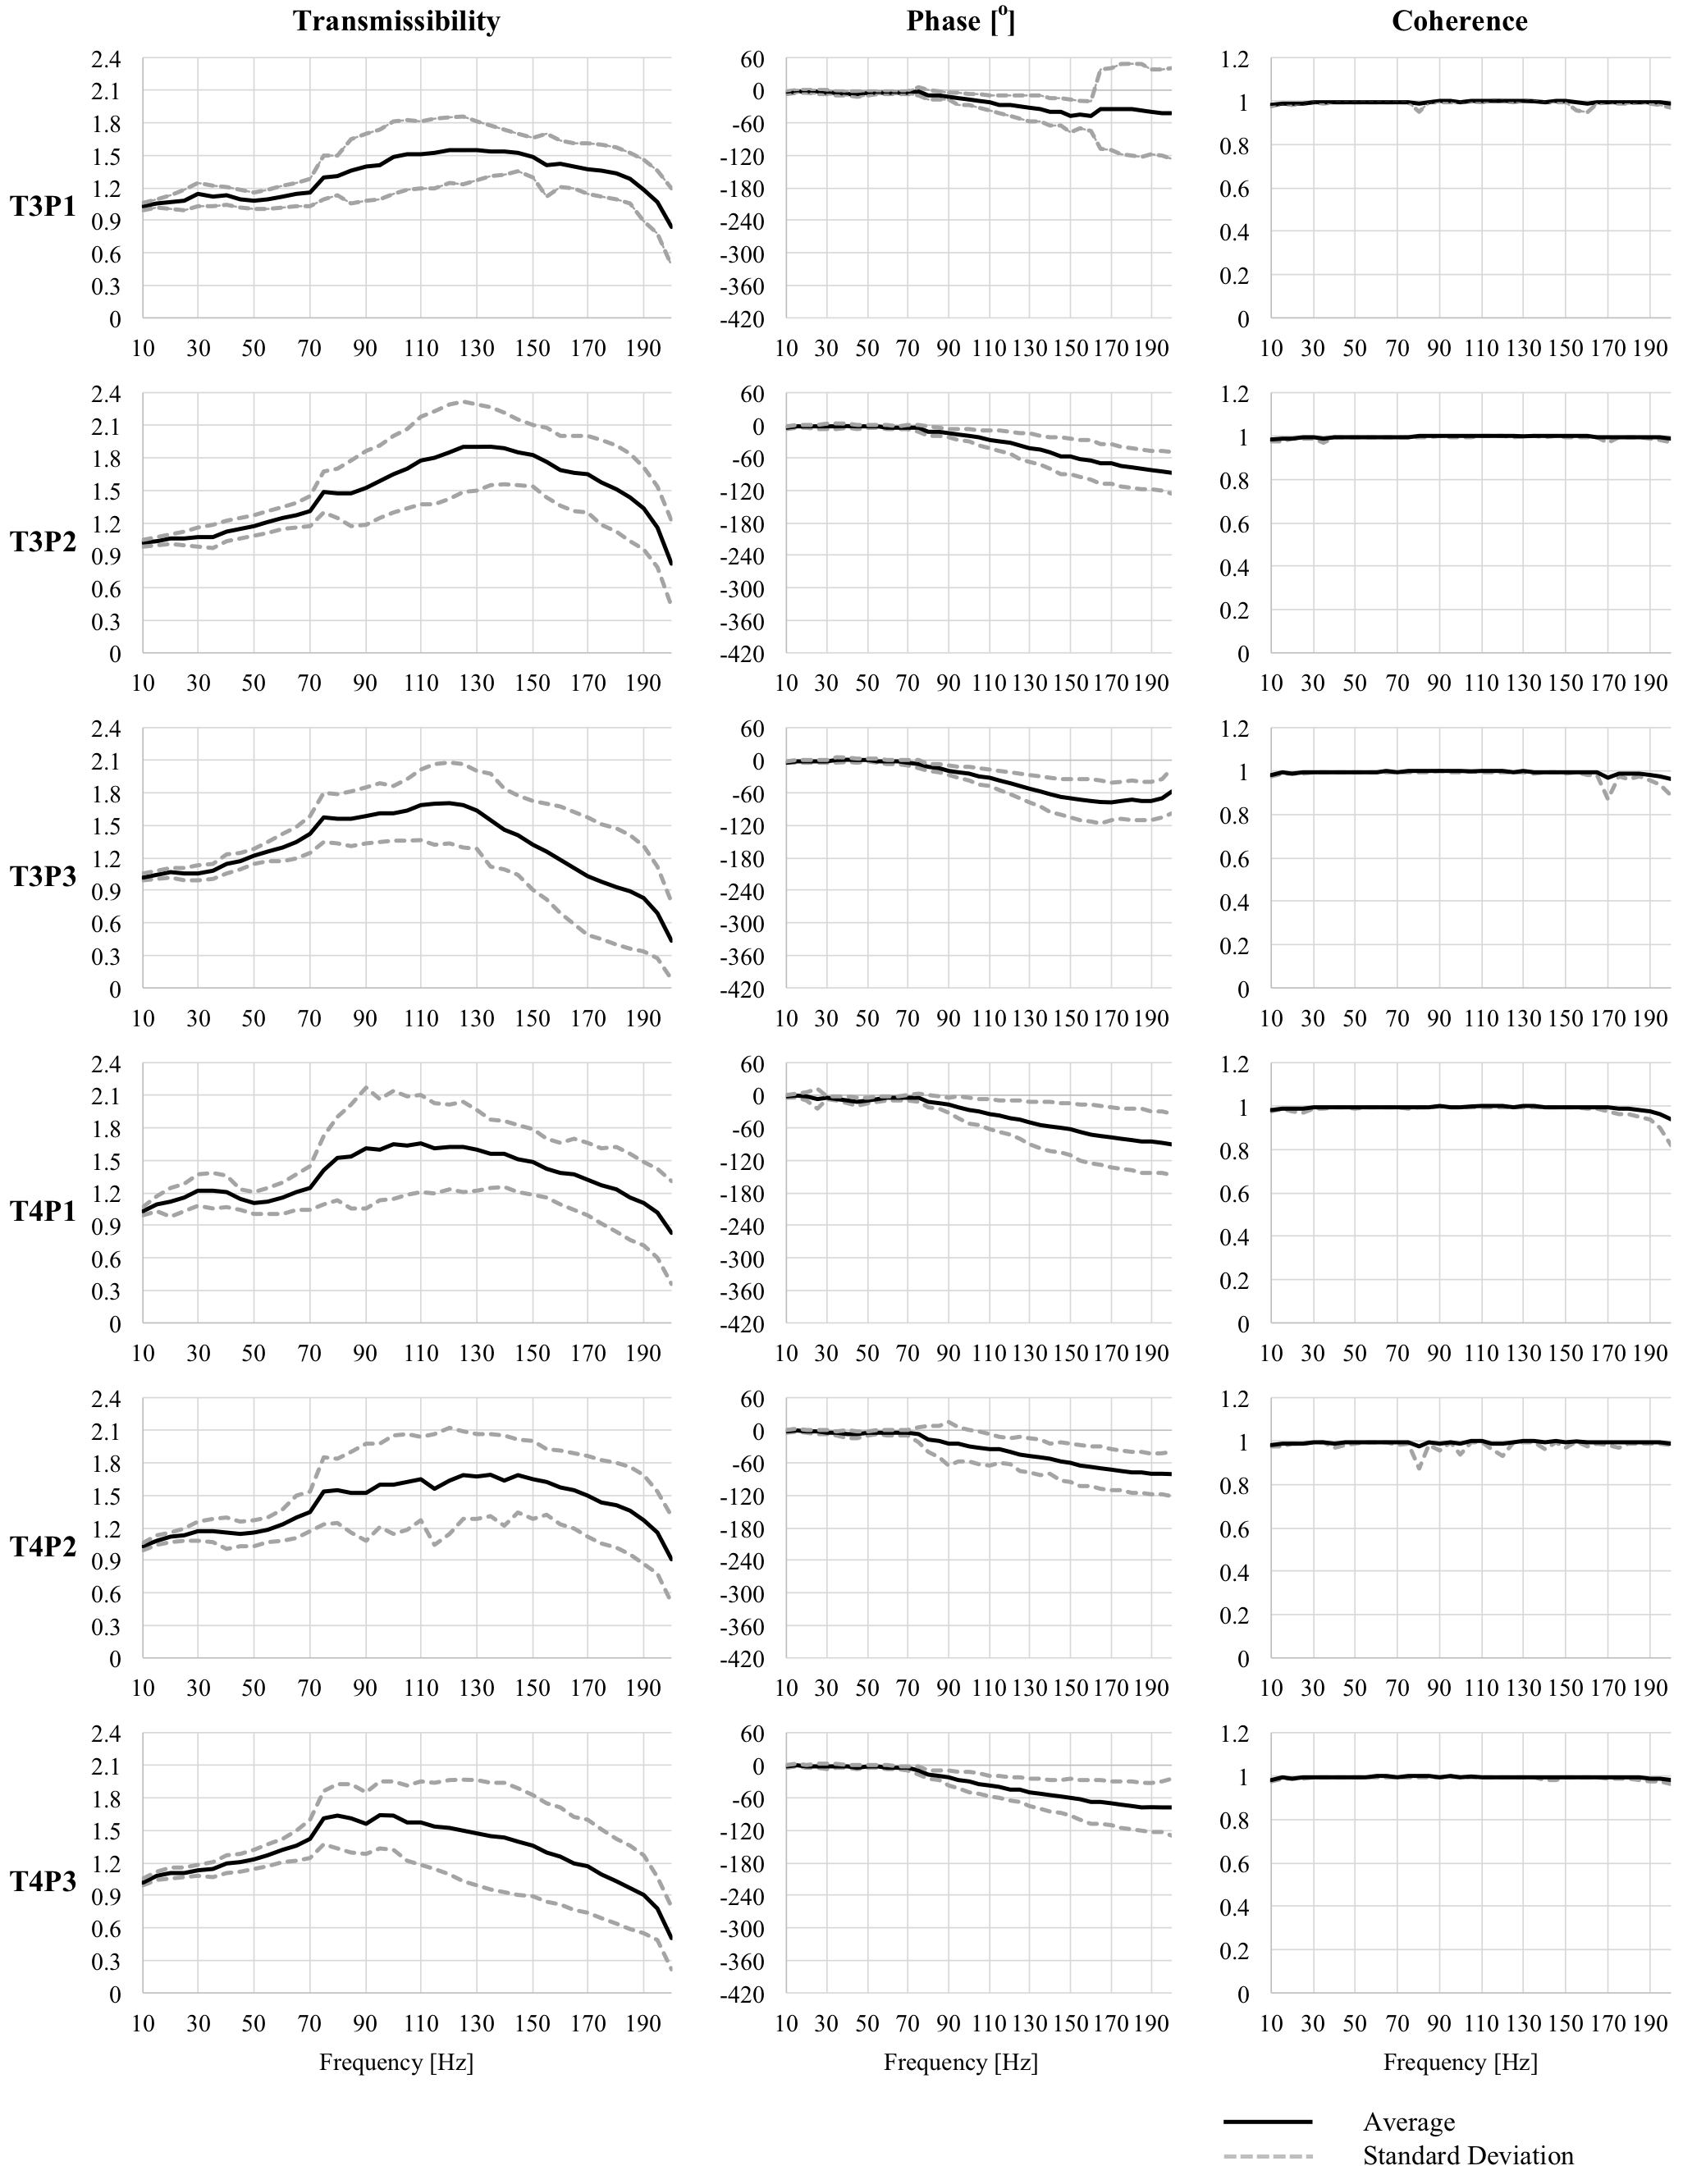


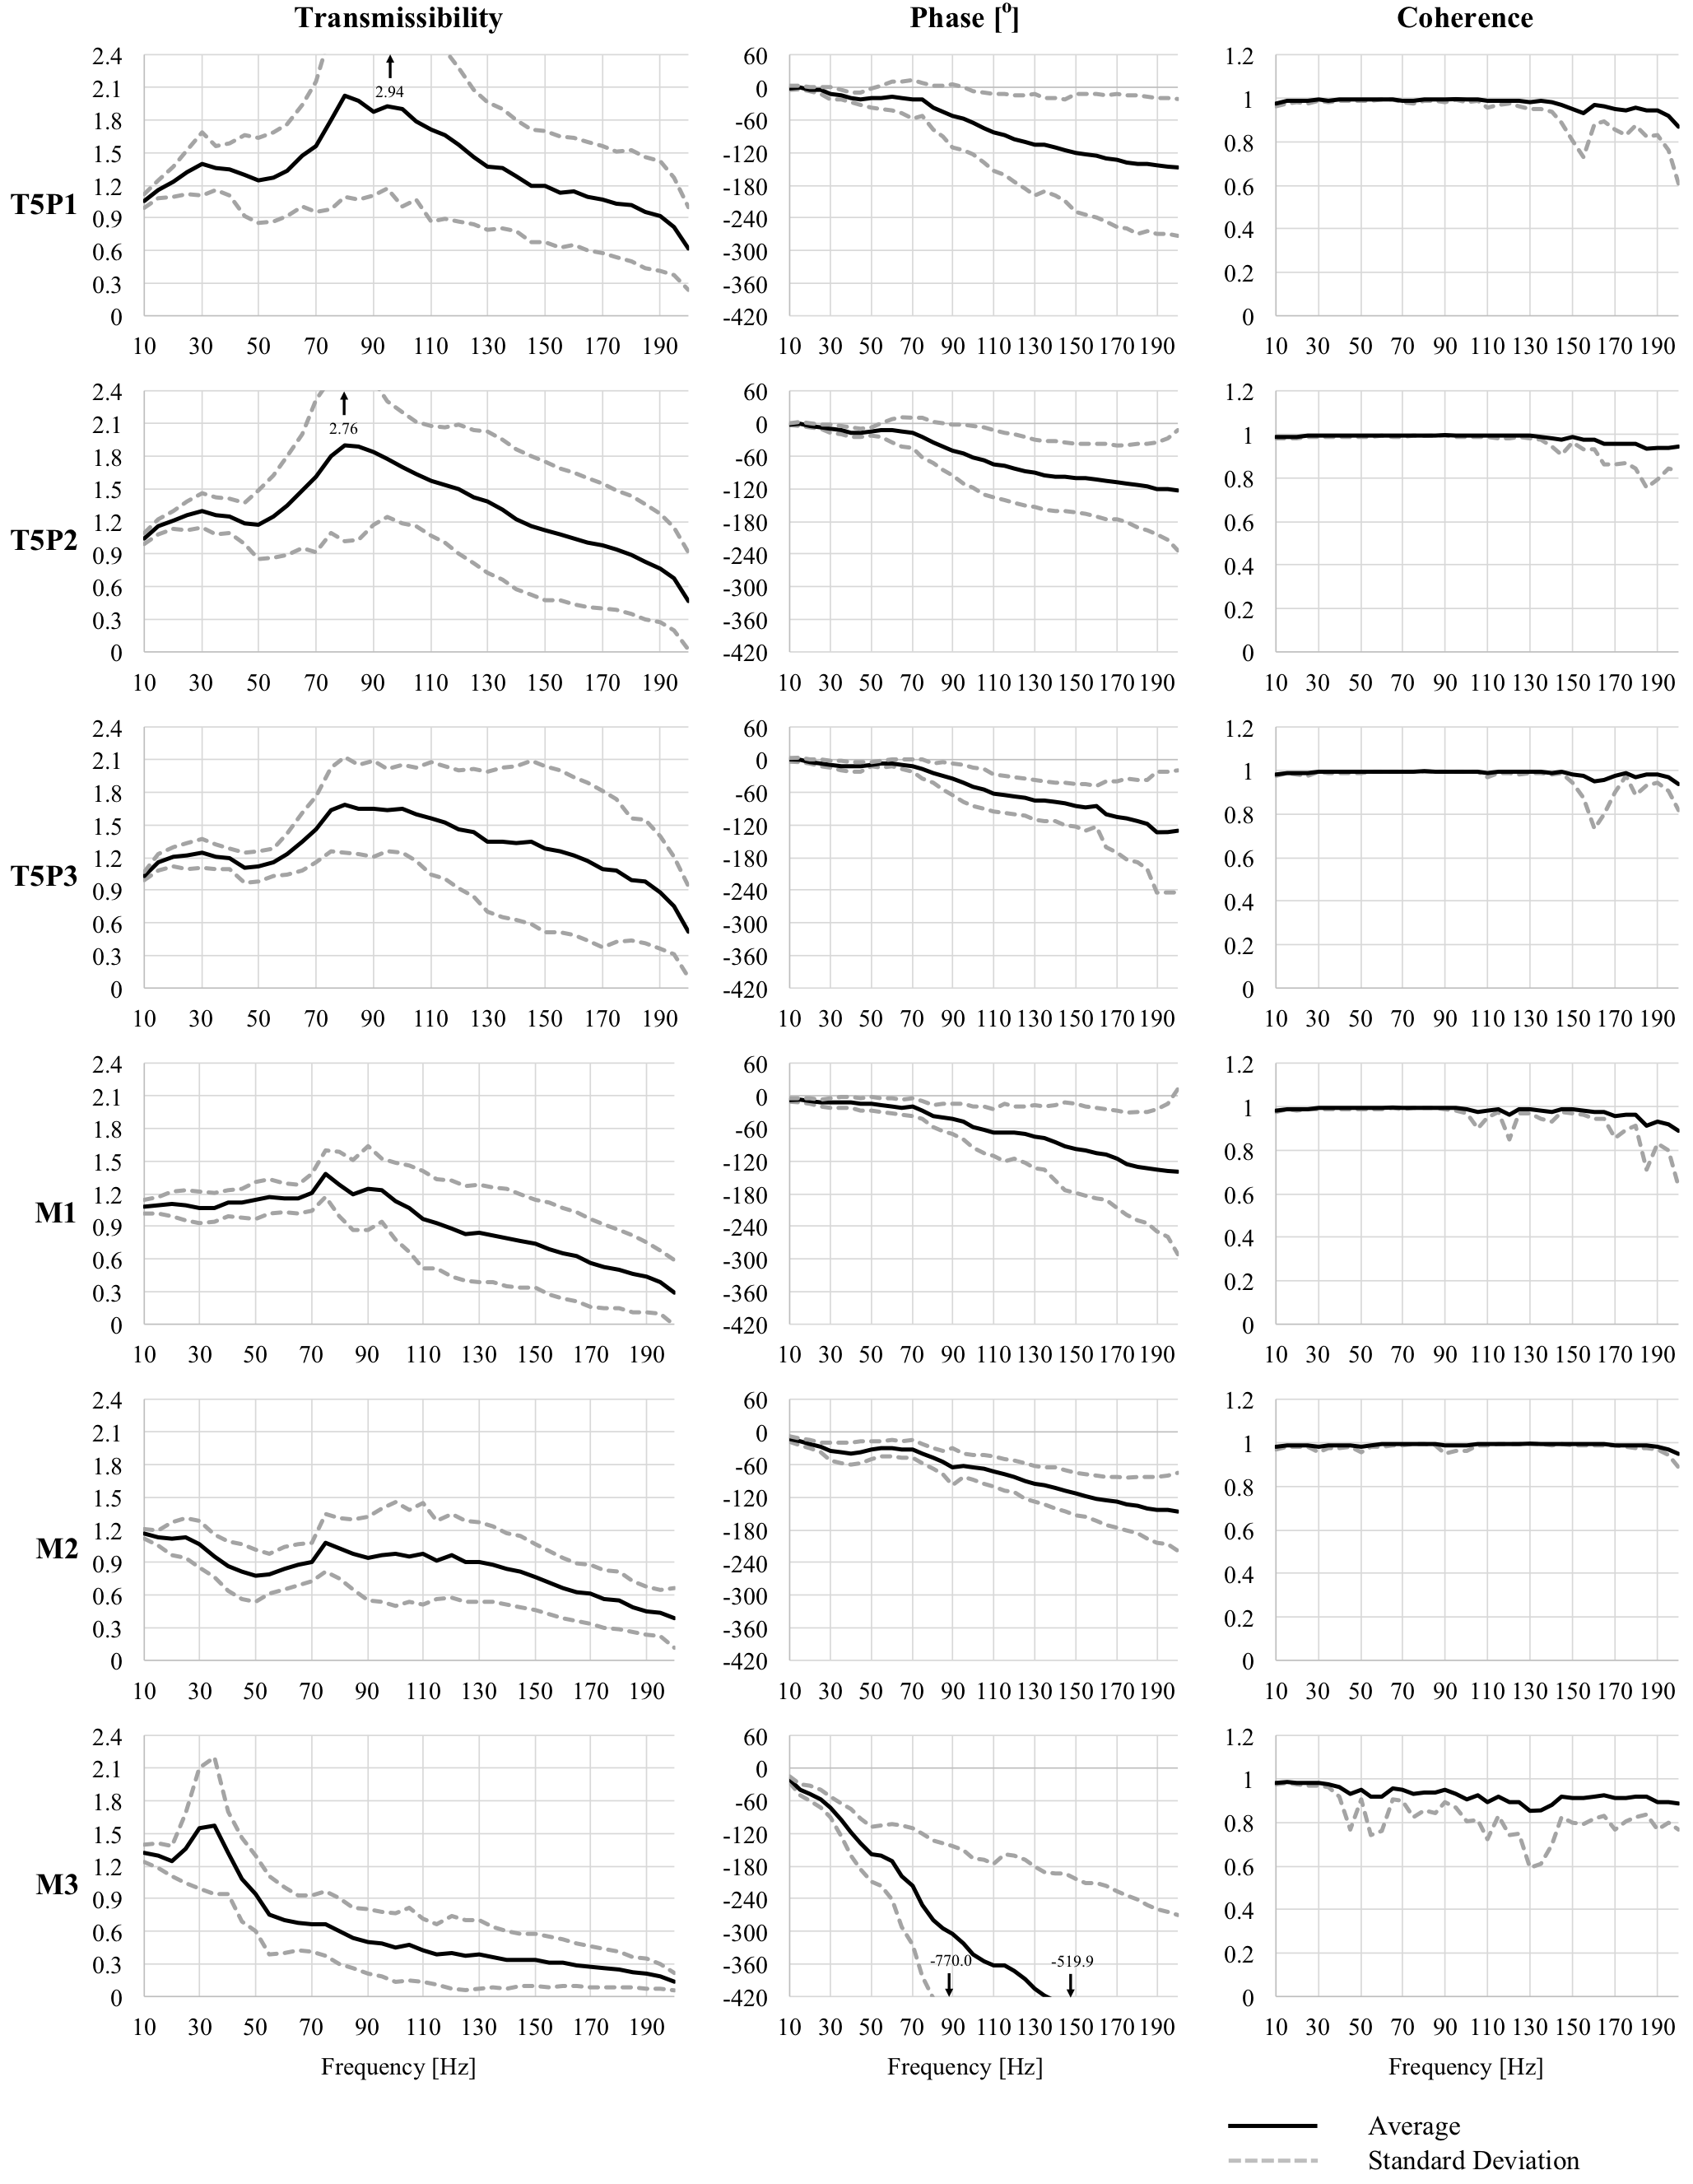


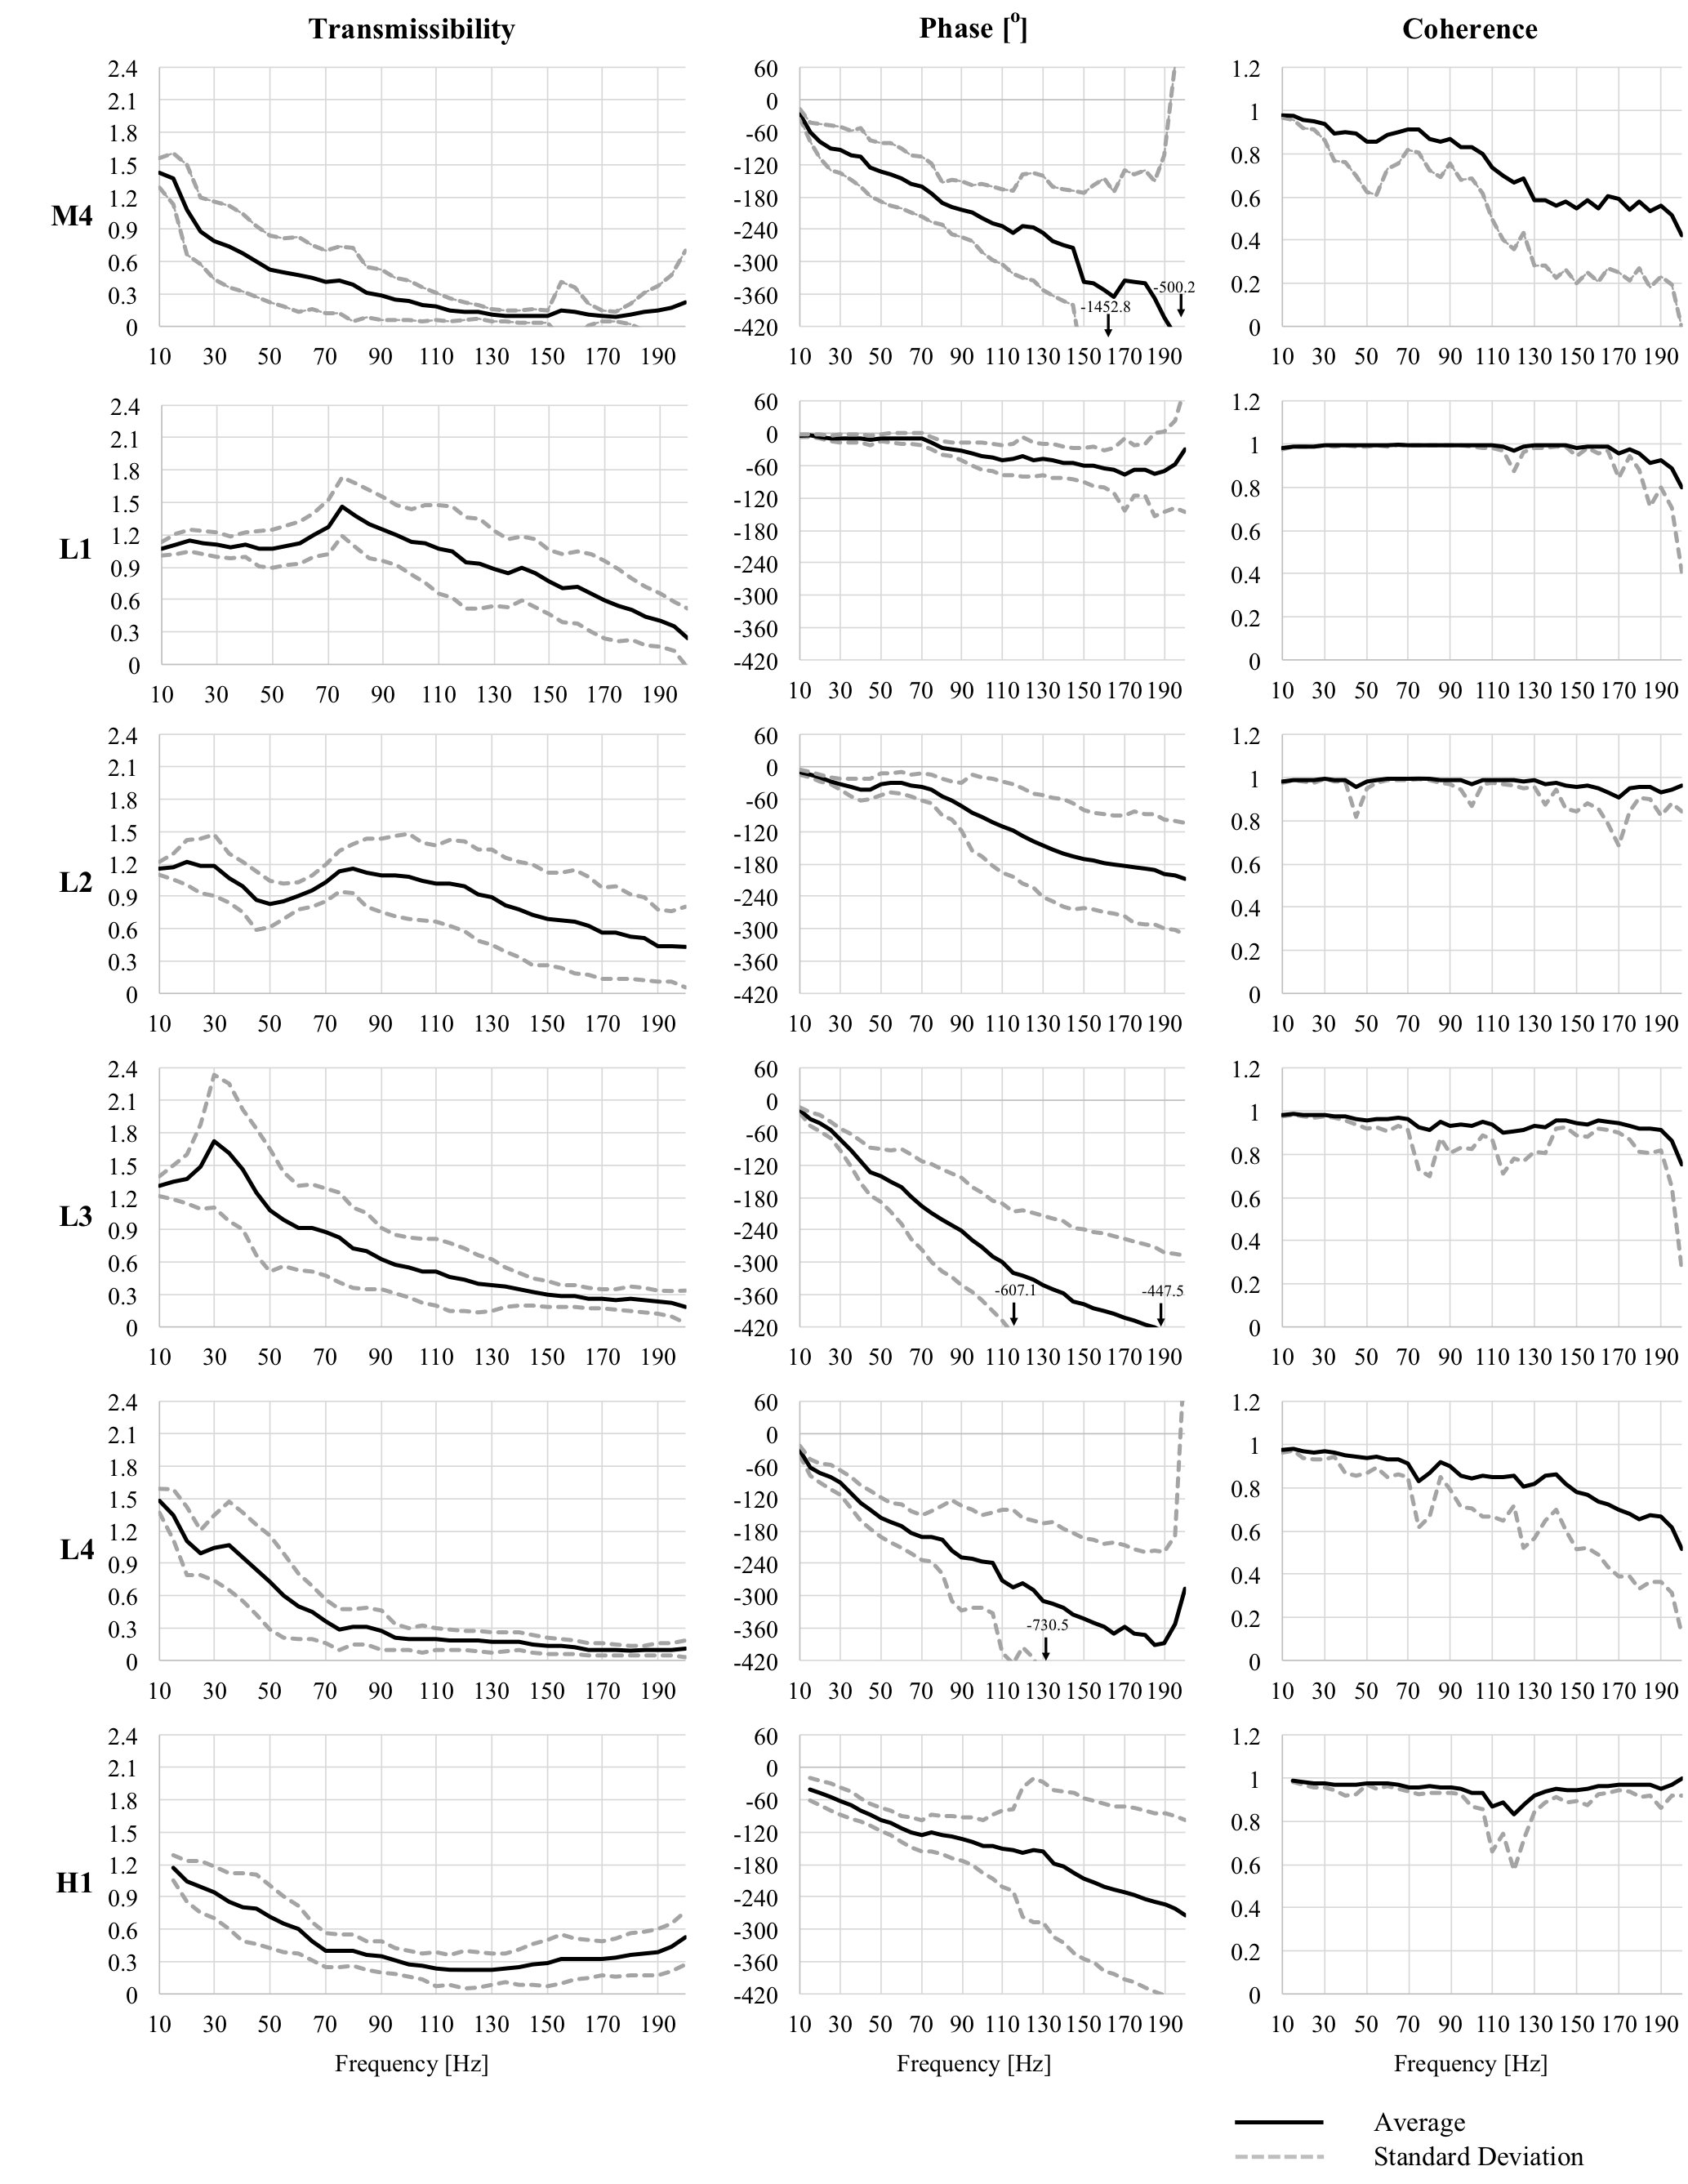

Supplement: Supplementary file 1 [file 14312948]
